# Supplementary material
Source: MDPI journal article supplement (https://www.mdpi.com/2079-9292/6/1/14)

Fig.1

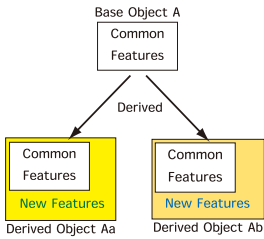

Fig.2

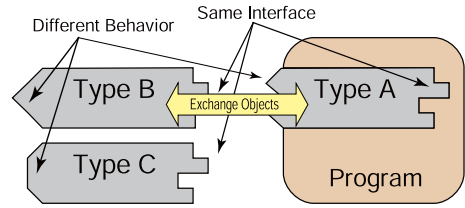

Fig.3

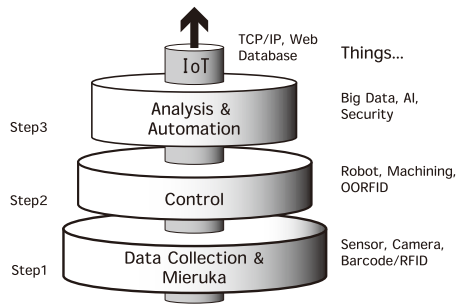

Fig.4

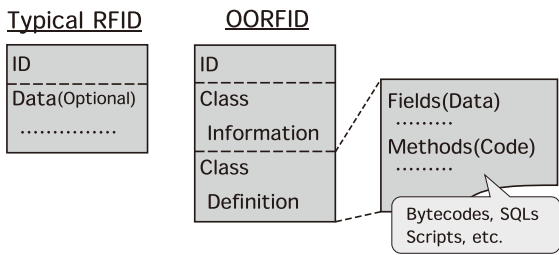

Fig.5

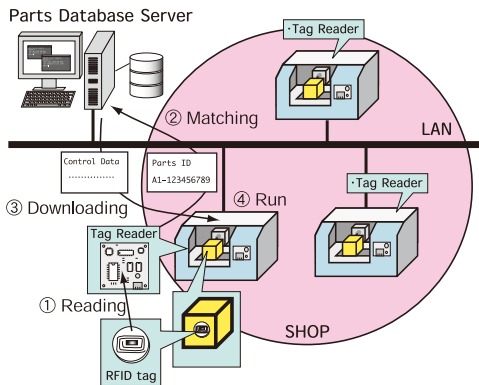

Fig.6

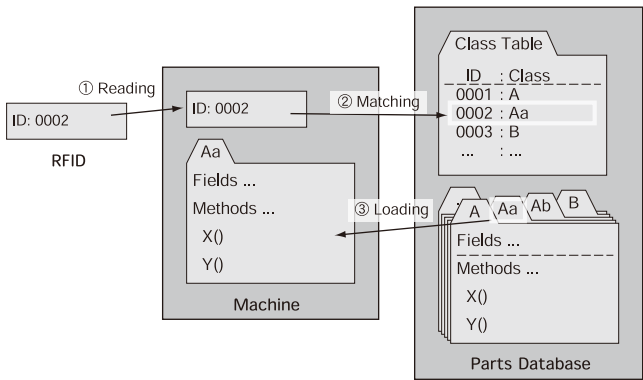

Fig.7

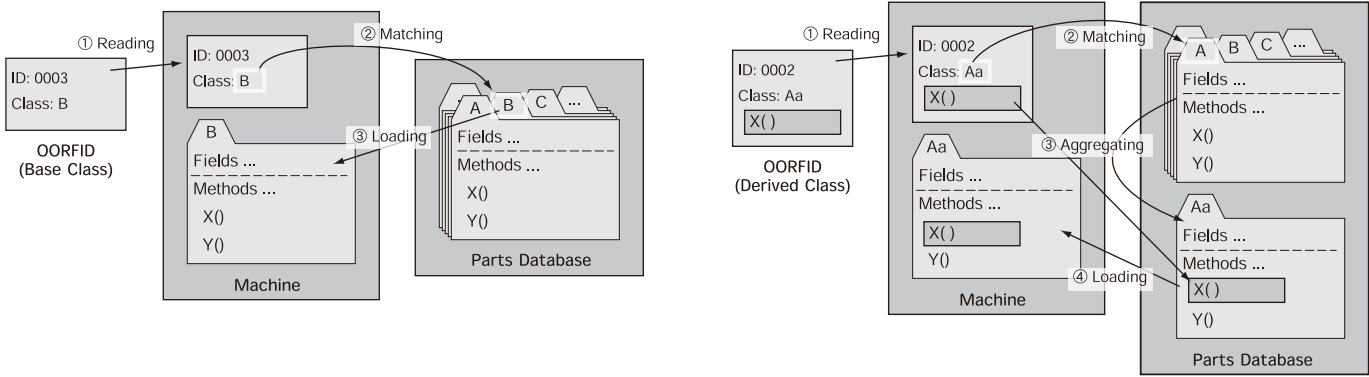

Fig.8

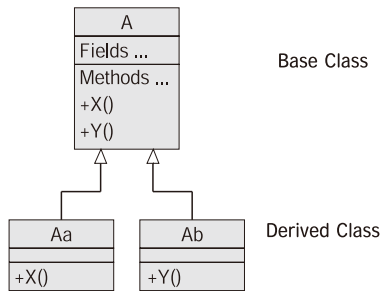

Fig.9

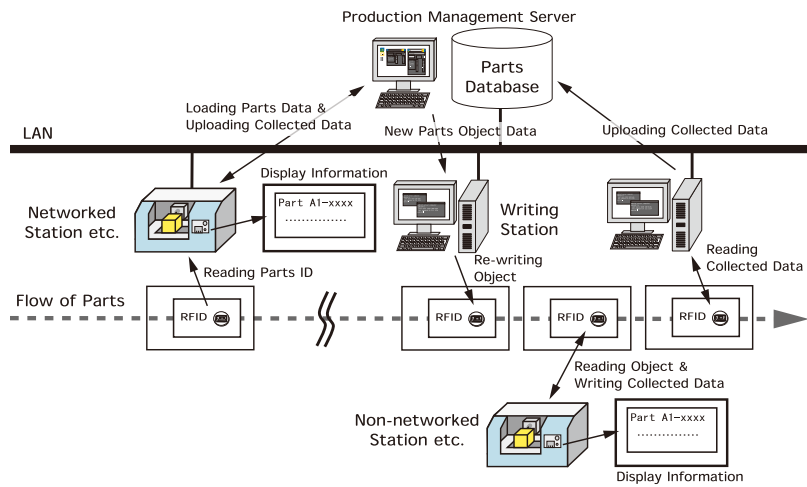

Fig.11

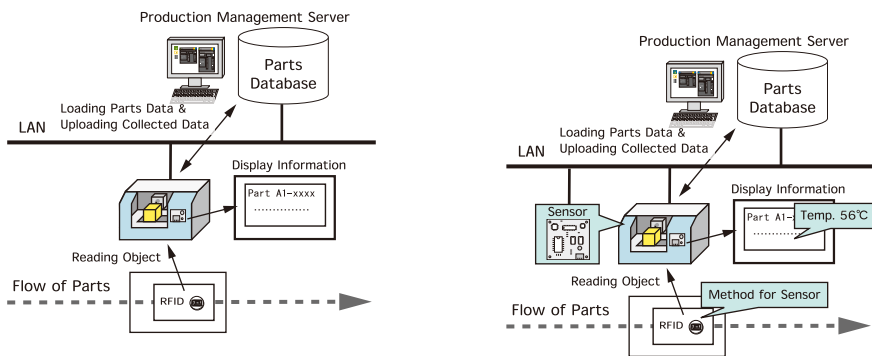

Supplement: s1 [file s1]
